# Supplementary material for: Unraveling the Interactions between Lithium and Twisted Graphene
Source: MDPI journal article supplement (doi:10.3390/ma17091941), 2024-04-23
Supplement: s1 [file s1]

# Unraveling the Interactions between Lithium and Twisted Graphene

Maximo Ramírez <sup>1</sup>, Giorgio De Luca <sup>2,\*</sup> and Lorenzo Caputi <sup>3</sup>

<sup>1</sup> Independent Researcher, 87036 Rende, Italy

<sup>2</sup> Research Institute on Membrane Technology (ITM-CNR), c/o University of Calabria, 87036 Rende, Italy

<sup>3</sup> Surface Nanoscience Group, Department of Physics, University of Calabria, 87036 Rende, Italy

\* Correspondence: g.deluca@itm.cnr.it

The potential energy profiles of Li and Li<sup>+</sup> referring to t-BLG were evaluated for slab-Li/Li<sup>+</sup> distances up to 6 Å considering three symmetry adsorption sites (Top, Hollow, Bridge) and outside configuration. The potential energies plots are shown in Figure S1

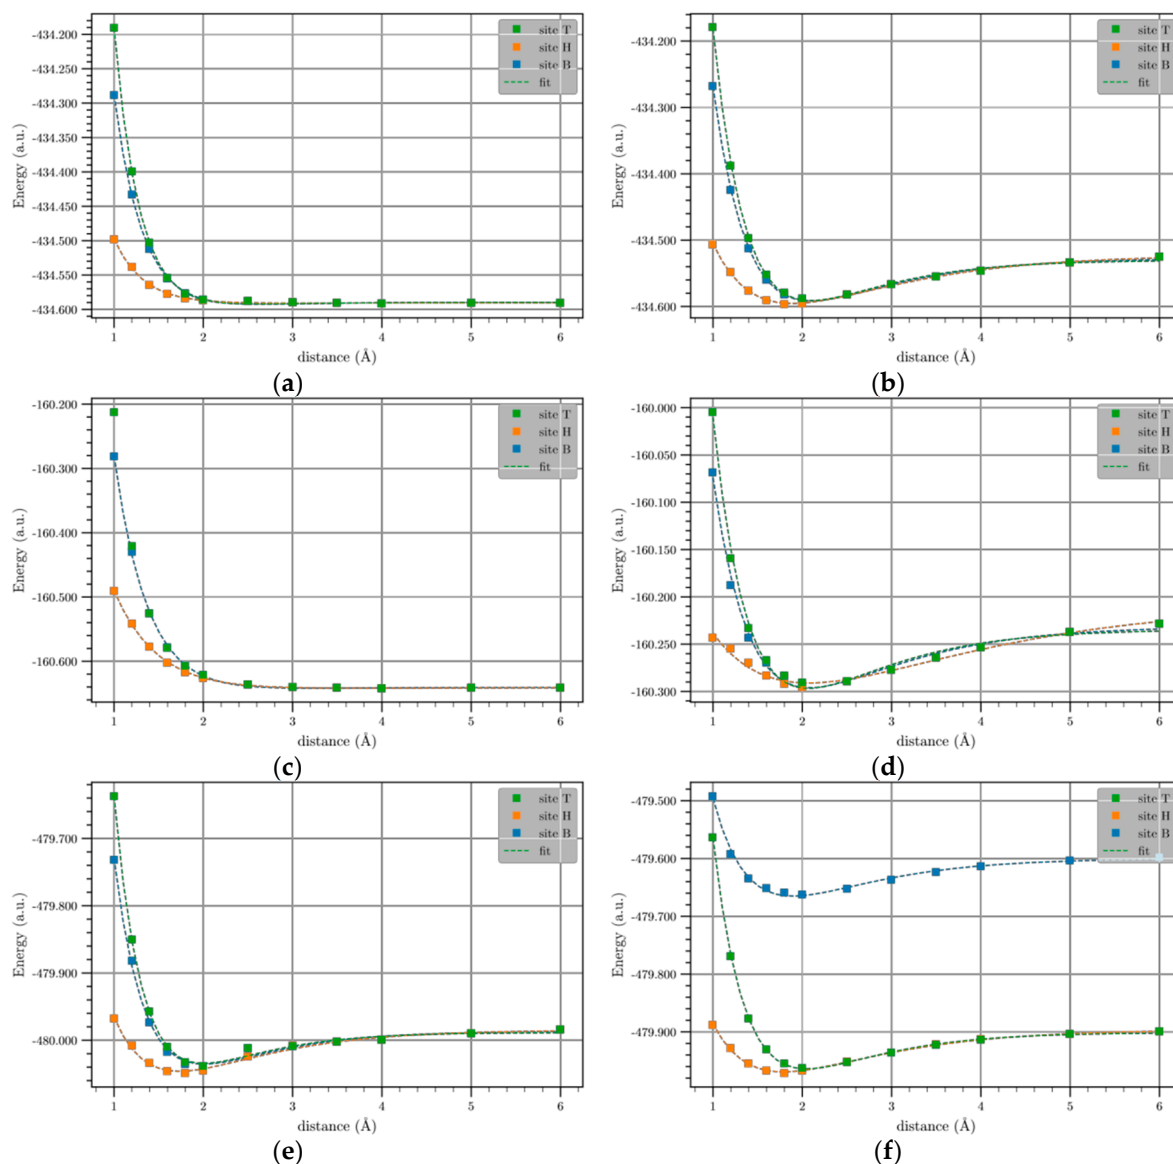

**Figure S1.** The potential energy profiles of Li (a), (c), (e) and Li<sup>+</sup> (b), (d), (f) for twist angles of 13.17°, 21.79°, 38.21° respectively, outside configuration.

The potential energy profiles of Li and Li<sup>+</sup> referring to t-BLG were evaluated for interlayer distances up to 6 Å considering three adsorption sites and inside configuration. The potential energies plots are shown in Figure S2

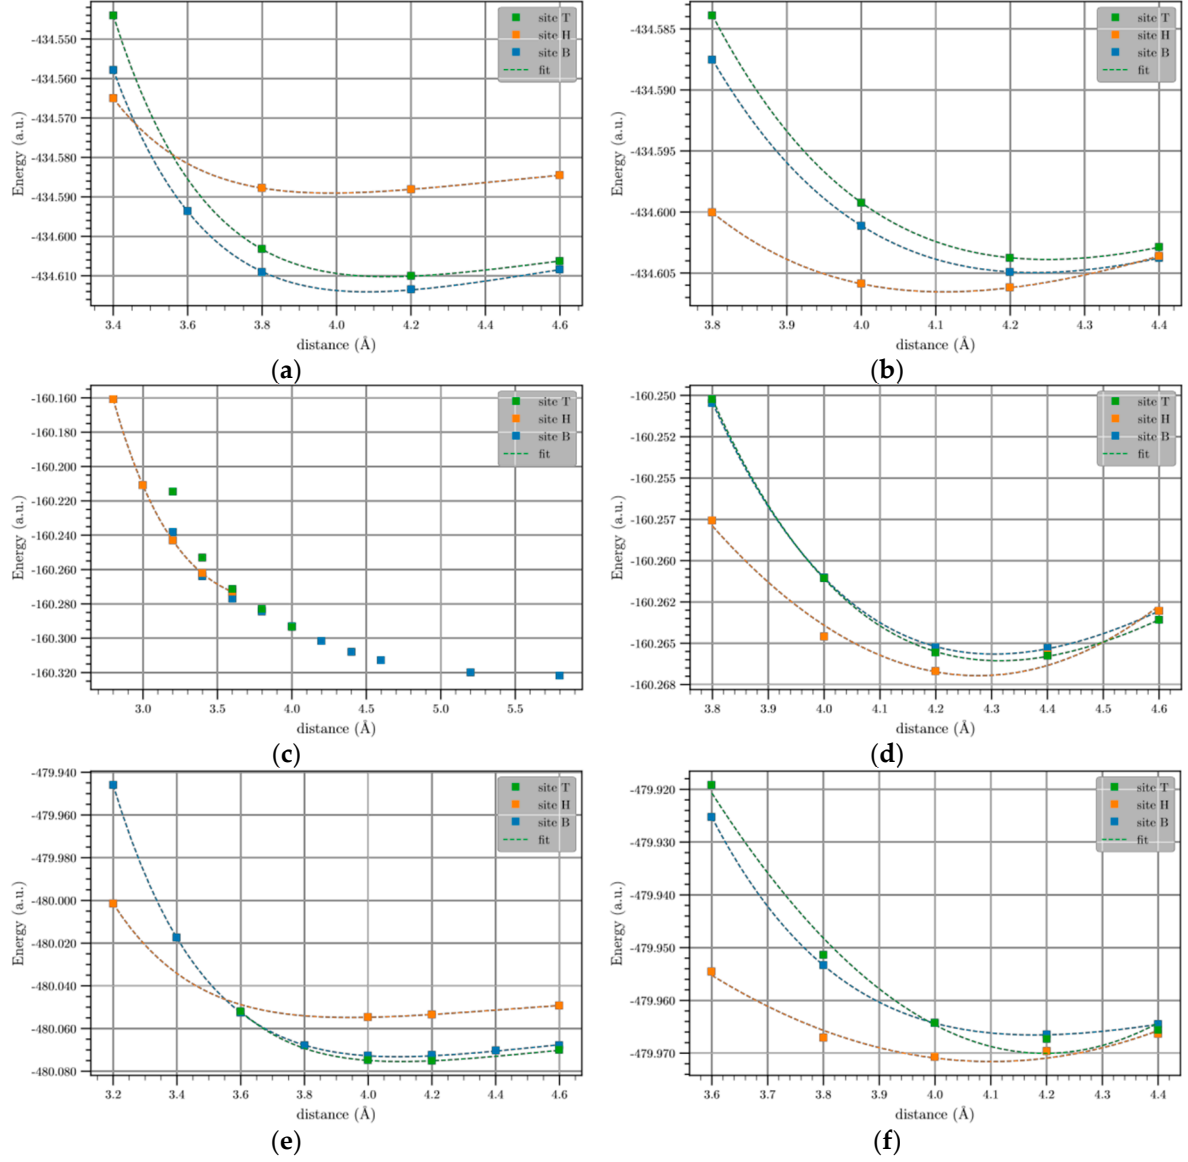

**Figure S2.** Potential energy profiles of Li (a), (c), (e) and Li<sup>+</sup> (b), (d), (f) for twist angles of 13.17°, 21.79°, 38.21°, respectively, considering inside configuration (sandwich).
